# Supplementary material
Source: publisher figshare collection journal article supplement (https://frontiersin.figshare.com/ndownloader/files/24631070)
Supplement: Supplementary file [file 24631070]

## Supplementary Material

### Supplementary Figures

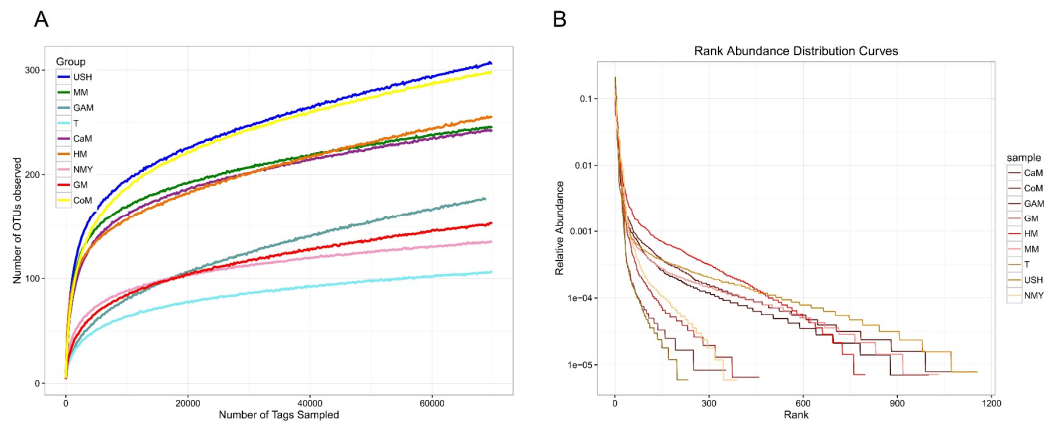

**Figure S1.** Species accumulation curve and the rarefaction curve.

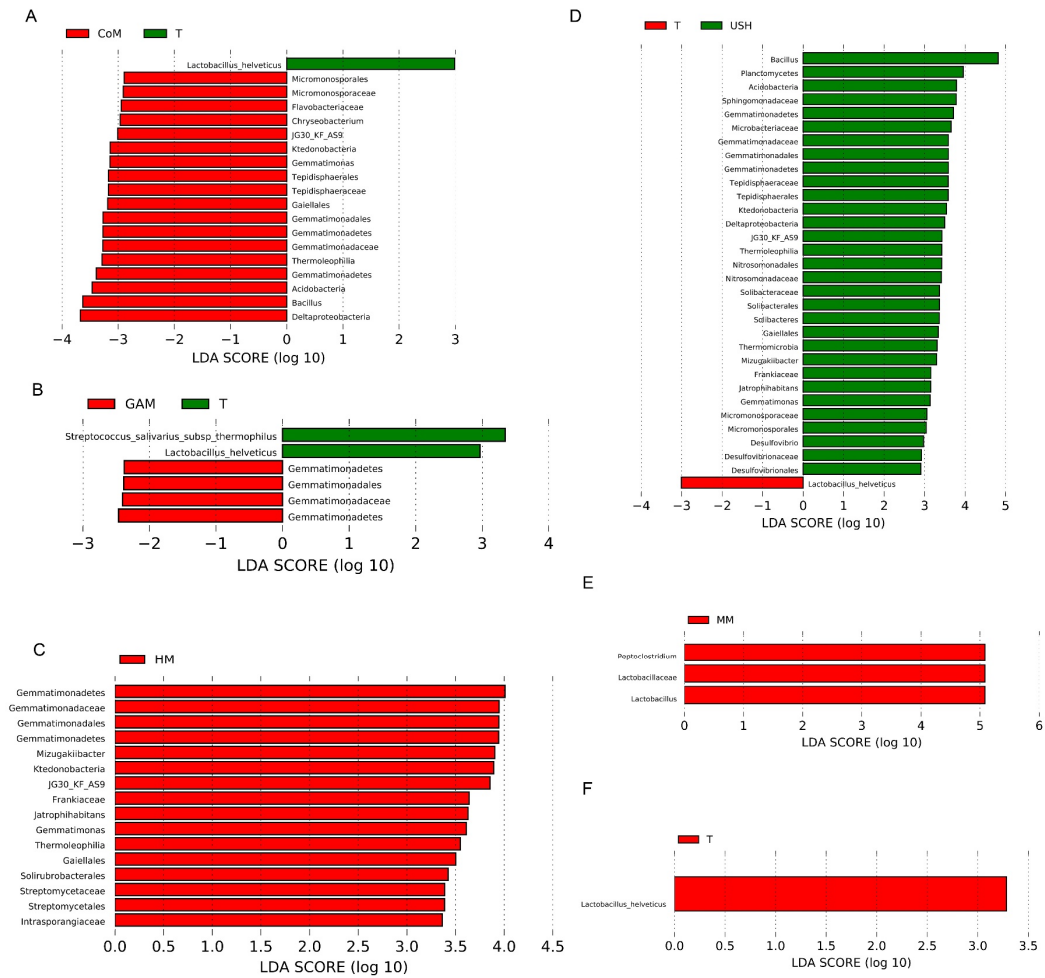

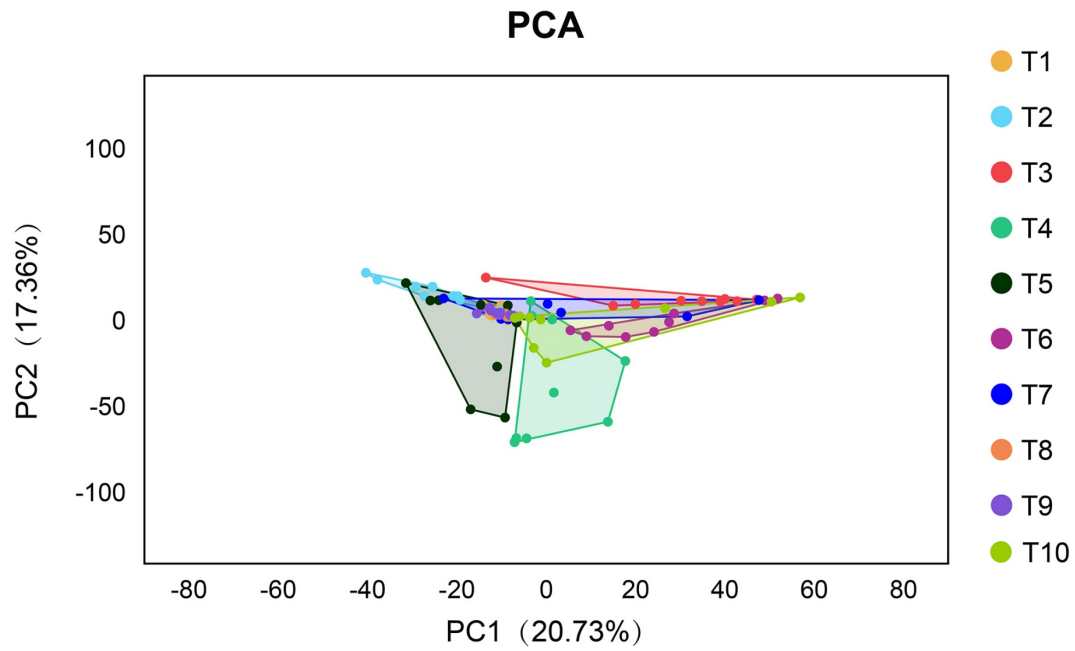

**Figure S3.**  $\beta$ -diversity principal component analysis among microbiota of ten fecal donors after 24 h fermentation.
